# Supplementary material for: Evolution of “adsorption–insertion” K+ storage behaviors in flower-like carbons with tunable heteroatom doping and graphitic structures
Source: Royal Society of Chemistry journal article supplement (doi:10.1039/d1se01938d), 2022-01-01
Supplement: d1se01938d1.pdf [file d1se01938d1.pdf]

## Supporting Information

### **Evolution of “adsorption-insertion” K<sup>+</sup> storage behaviors in flower-like carbons with tunable heteroatom doping and graphitic structure**

Wenrui Wei,<sup>‡</sup> Haoran Lv,<sup>‡</sup> Xuehui Wang,<sup>‡</sup> Wenzhe Zhang, Zining Sun, Jing Shi, Minghua Huang, Shuai Liu, Zhicheng Shi, and Huanlei Wang\*

School of Materials Science and Engineering, Ocean University of China, Qingdao, Shandong 266100, China

<sup>‡</sup>These authors contributed equally to this work.

\*Corresponding author e-mail address: huanleiwang@gmail.com (Prof. H. Wang)

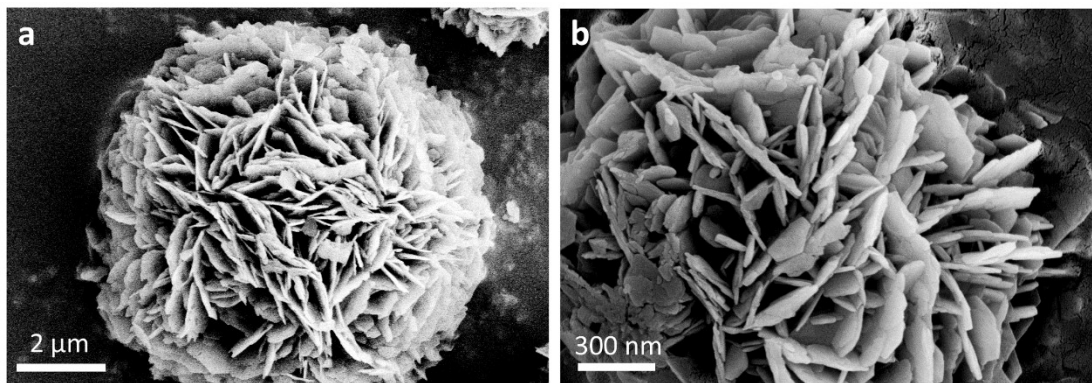

**Fig. S1** Representative SEM images of BMS.

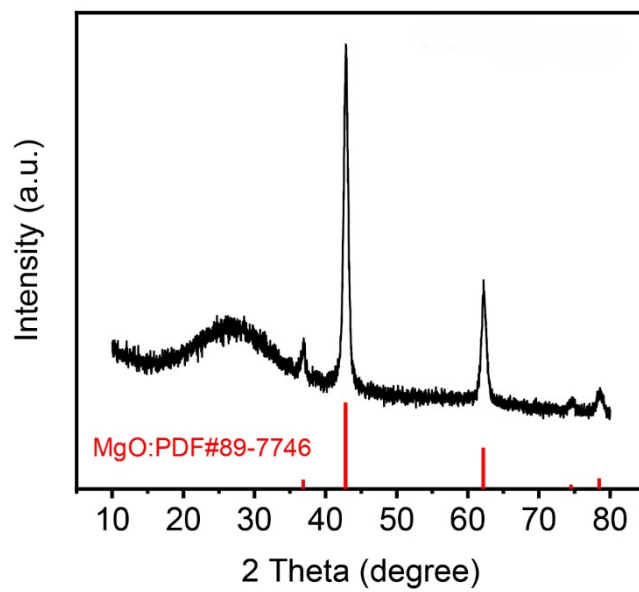

**Fig. S2** XRD pattern of N,S-CNS without acid washing.

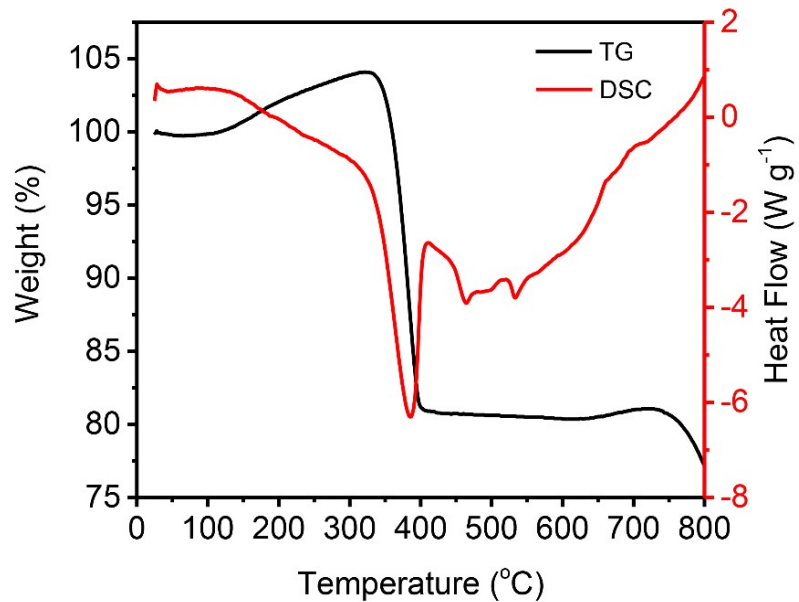

**Fig. S3** TG-DSC curves of the BMS template.

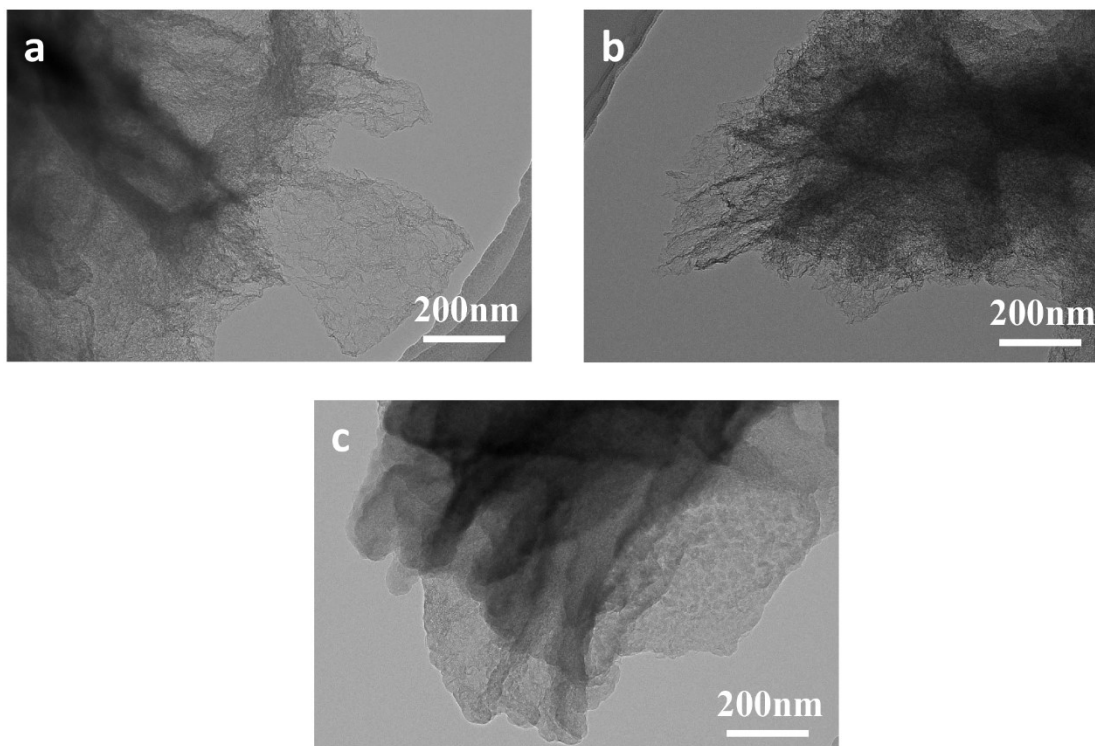

**Fig. S4** Representative TEM images of (a) N,S-CNS, (b) N,S-CNS-900 and (c) N,S-CNS-1200.

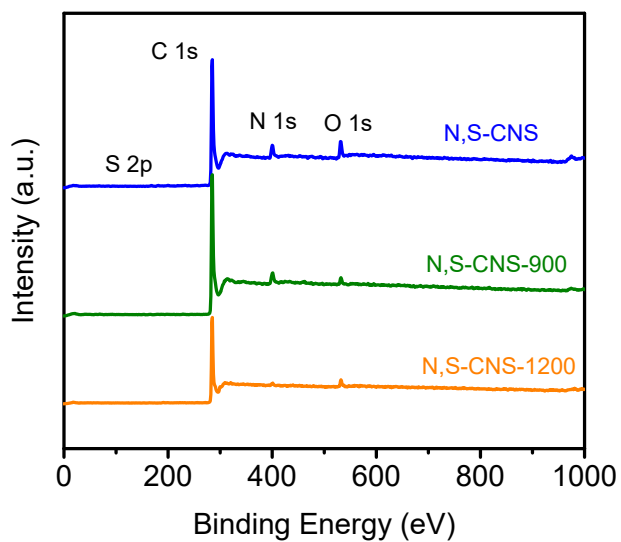

**Fig. S5** The survey spectra of N,S-CNS, N,S-CNS-900 and N,S-CNS-1200.

**Table S1.** Textural properties and surface chemistry of N,S-CNSs.

| Sample       | Textural Properties |               |                 |            | Surface Chemistry (XPS) |      |      |      |                 |
|--------------|---------------------|---------------|-----------------|------------|-------------------------|------|------|------|-----------------|
|              | $S_{BET}$           | $V_{total}$   | Pore Volume (%) |            | C                       | O    | S    | N    | $I_G/(I_G+I_D)$ |
|              | $m^2 g^{-1}$        | $cm^3 g^{-1}$ | $V_{<2nm}$      | $V_{>2nm}$ | at%                     | at%  | at%  | at%  |                 |
| N,S-CNS      | 1263                | 0.95          | 30.8            | 69.2       | 88.50                   | 5.10 | 0.27 | 6.13 | 0.356           |
| N,S-CNS-900  | 1287                | 1.09          | 26.0            | 74.0       | 92.30                   | 2.11 | 0.15 | 5.44 | 0.376           |
| N,S-CNS-1200 | 1415                | 1.12          | 28.8            | 71.2       | 94.33                   | 3.42 | 0.13 | 2.12 | 0.386           |

**Table S2.** Carbon bonding analysis of N,S-CNSs samples.

| Binding Energy (eV) | Carbon Bonding     | Concentration (%/at %) |             |              |
|---------------------|--------------------|------------------------|-------------|--------------|
|                     |                    | N,S-CNS                | N,S-CNS-900 | N,S-CNS-1200 |
| 284.4               | C=C                | 36.2/32.1              | 41.4/38.2   | 46.2/43.6    |
| 285.1               | C-C                | 25.4/22.4              | 21.7/20.0   | 19.9/18.8    |
| 285.9               | C-N                | 11.3/10.0              | 10.1/9.3    | 7.6/7.2      |
| 286.3               | C-S                | 1.9/1.7                | 1.5/1.4     | 1.2/1.1      |
| 286.8               | C-O                | 9.2/8.2                | 7.5/6.9     | 6.6/6.2      |
| 287.9               | C=O                | 6.3/5.6                | 5.0/4.6     | 4.5/4.2      |
| 289.1               | O-C=O              | 6.5/5.7                | 5.8/5.4     | 5.5/5.2      |
| 290.6               | $\pi$ - $\pi$      | 3.2/2.8                | 7.0/6.5     | 8.5/8.0      |
|                     | $sp^2/(sp^2+sp^3)$ | 58.9                   | 65.6        | 69.9         |

**Table S3.** Nitrogen and Sulfur bonding analysis of N,S-CNSs samples.

|              | N [%] |      |      |                  | S[%]                |                     |                      |
|--------------|-------|------|------|------------------|---------------------|---------------------|----------------------|
|              | N-6   | N-5  | N-Q  | N-O <sub>x</sub> | S 2p <sub>3/2</sub> | S 2p <sub>1/2</sub> | C-SO <sub>x</sub> -C |
| N,S-CNS      | 27.8  | 52.1 | 14.6 | 5.5              | 12.3                | 6.1                 | 81.6                 |
| N,S-CNS-900  | 29.7  | 46.5 | 16.3 | 7.5              | 44.1                | 21.9                | 34.0                 |
| N,S-CNS-1200 | 35.0  | 26.1 | 29.8 | 9.1              | 48.4                | 24.2                | 27.4                 |

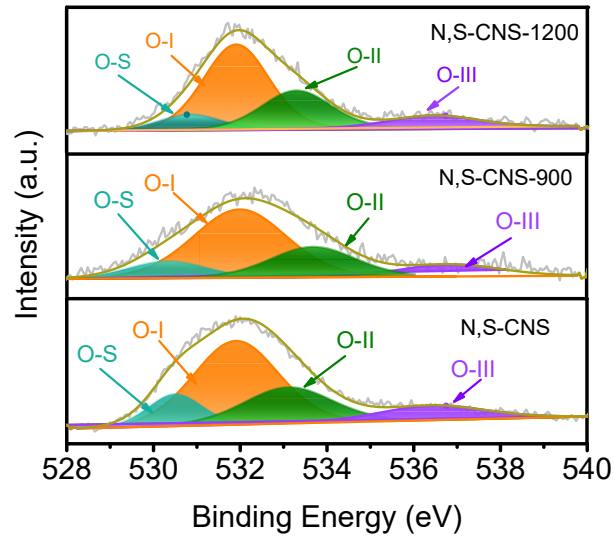

**Fig. S6** High-resolution XPS spectra of O 1s for N,S-CNS, N,S-CNS-900, N,S-CNS-1200 and their corresponding fitting curves.

**Table S4.** ICE-Surface area detail data of N,S-CNS-1200 and other reported carbon anodes for PIBs.

| Sample                   | Surface area (m <sup>2</sup> g <sup>-1</sup> ) | ICE (%)     |                  |
|--------------------------|------------------------------------------------|-------------|------------------|
| <b>N,S-CNS-1200</b>      | <b>1415</b>                                    | <b>44.9</b> | <b>This work</b> |
| N-CNS <sup>1</sup>       | 674                                            | 20          | Ref.1            |
| rGO-aerogel <sup>2</sup> | 219                                            | 26          | Ref.2            |
| NOHPHC <sup>3</sup>      | 1030                                           | 25          | Ref.3            |
| NCNF-650 <sup>4</sup>    | 96                                             | 49          | Ref.4            |
| SNHC <sup>5</sup>        | 110                                            | 35          | Ref.5            |
| OFPCN <sup>6</sup>       | 1544                                           | 27          | Ref.6            |
| KC <sup>7</sup>          | 912                                            | 46          | Ref.7            |
| NPC <sup>8</sup>         | 341                                            | 43          | Ref.8            |
| ENPCS-500 <sup>9</sup>   | 616                                            | 50          | Ref.9            |
| FFGF <sup>10</sup>       | 874                                            | 41          | Ref.10           |
| NPC <sup>11</sup>        | 316                                            | 30          | Ref.11           |
| S/N-CNFAS <sup>12</sup>  | 402                                            | 52          | Ref.12           |
| NBCNTs-1 <sup>13</sup>   | 150                                            | 23          | Ref.13           |
| HENC <sup>14</sup>       | 110                                            | 46          | Ref.14           |
| S-MPC-700 <sup>15</sup>  | 247                                            | 41          | Ref.15           |
| NSC <sup>16</sup>        | 436                                            | 50          | Ref.16           |

|                        |     |    |        |
|------------------------|-----|----|--------|
| BN-PC <sup>17</sup>    | 644 | 28 | Ref.17 |
| NCPs-600 <sup>18</sup> | 501 | 24 | Ref.18 |

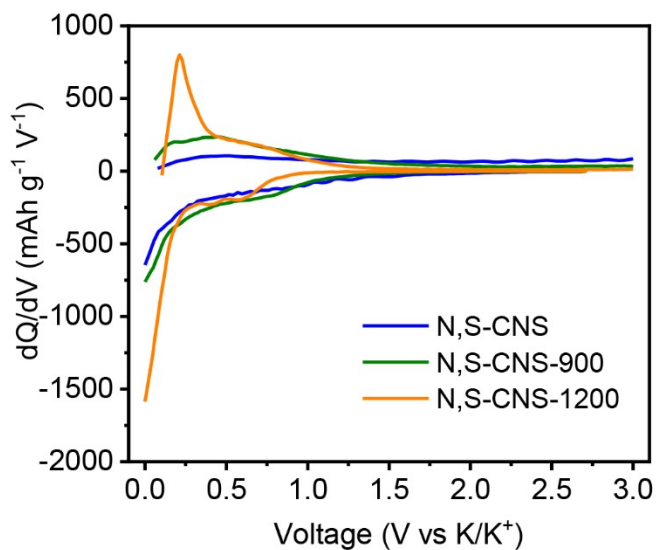

**Fig. S7** Differential capacity vs. voltage for N,S-CNS, N,S-CNS-900 and N,S-CNS-1200 during the fifth cycle at the current of 0.05 A g<sup>-1</sup>.

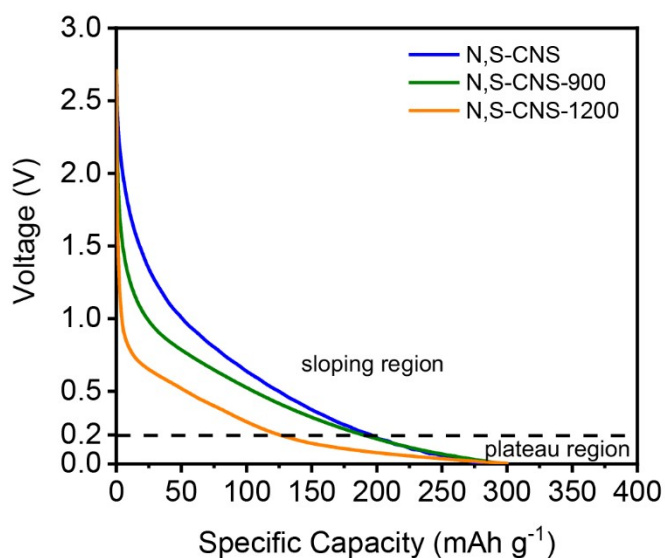

**Fig. S8** Galvanostatic discharge curves of N,S-CNS, N,S-CNS-900 and N,S-CNS-1200 at the fifth cycle.



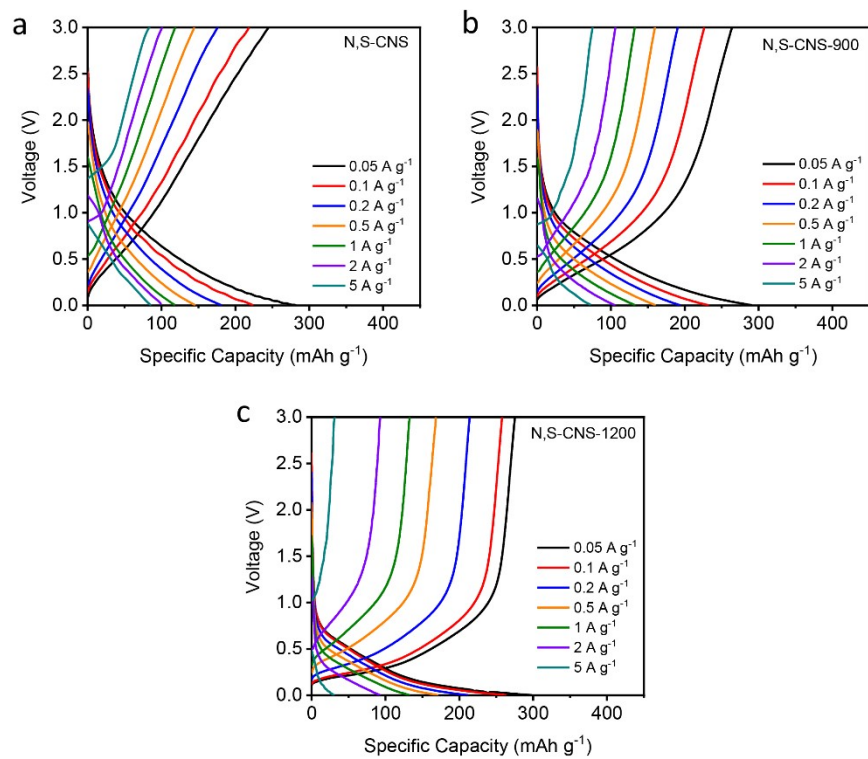

**Fig. S9** Charge/discharge profiles of (a) N,S-CNS, (b) N,S-CNS-900 and (c) N,S-CNS-1200 at different current densities.

**Table S5.** The capacity contributions from sloping and plateau regions at various current densities.

| Current density (A g <sup>-1</sup> ) | N,S-CNS                                                    |           | N,S-CNS-900                                                |            | N,S-CNS-1200                                               |            |
|--------------------------------------|------------------------------------------------------------|-----------|------------------------------------------------------------|------------|------------------------------------------------------------|------------|
|                                      | Capacity (mAh g <sup>-1</sup> )/ Capacity contribution (%) |           | Capacity (mAh g <sup>-1</sup> )/ Capacity contribution (%) |            | Capacity (mAh g <sup>-1</sup> )/ Capacity contribution (%) |            |
|                                      | Sloping                                                    | Plateau   | Sloping                                                    | Plateau    | Sloping                                                    | Plateau    |
| 0.05                                 | 195.1/69.2                                                 | 87.0/30.8 | 189.1/63.7                                                 | 107.6/36.3 | 125.7/42.1                                                 | 172.6/57.9 |
| 0.1                                  | 164.6/73.5                                                 | 59.4/26.5 | 157.1/67.6                                                 | 75.2/32.4  | 118.1/44.5                                                 | 147.2/55.5 |
| 0.2                                  | 131.0/72.3                                                 | 50.2/27.7 | 132.5/68.3                                                 | 61.6/31.7  | 103.7/47.9                                                 | 112.8/52.1 |
| 0.5                                  | 105.3/72.2                                                 | 40.6/27.8 | 106.6/66.5                                                 | 53.8/33.5  | 87.7/52.4                                                  | 79.8/47.6  |
| 1                                    | 85.4/72.1                                                  | 33.1/27.9 | 83.4/62.6                                                  | 49.8/37.4  | 69.6/52.3                                                  | 63.5/47.7  |
| 2                                    | 75.0/75.4                                                  | 24.5/24.6 | 61.6/58.2                                                  | 44.3/41.8  | 40.5/43.5                                                  | 52.7/56.5  |
| 5                                    | 60.8/70.9                                                  | 25.0/29.1 | 36.2/50.0                                                  | 36.3/50.0  | 8.3/27.2                                                   | 22.2/72.8  |

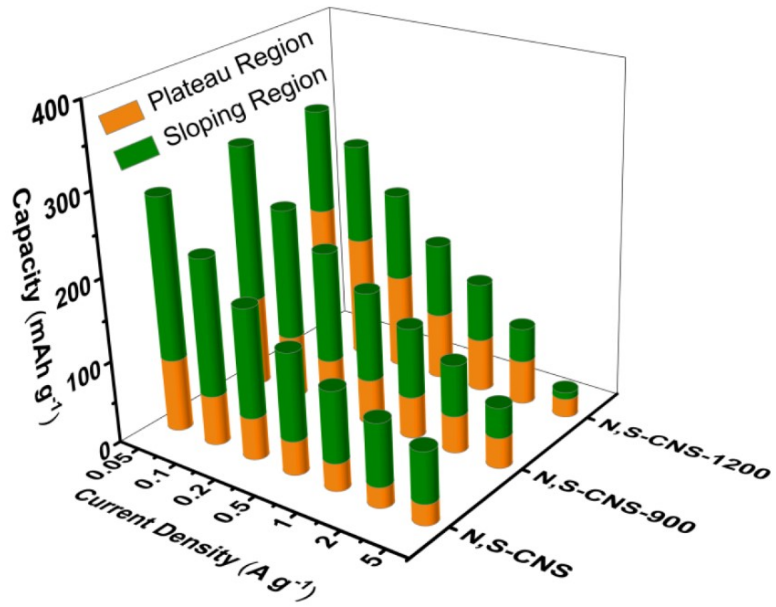

**Fig. S10** The capacities from the sloping and plateau regions as a function of the current density.

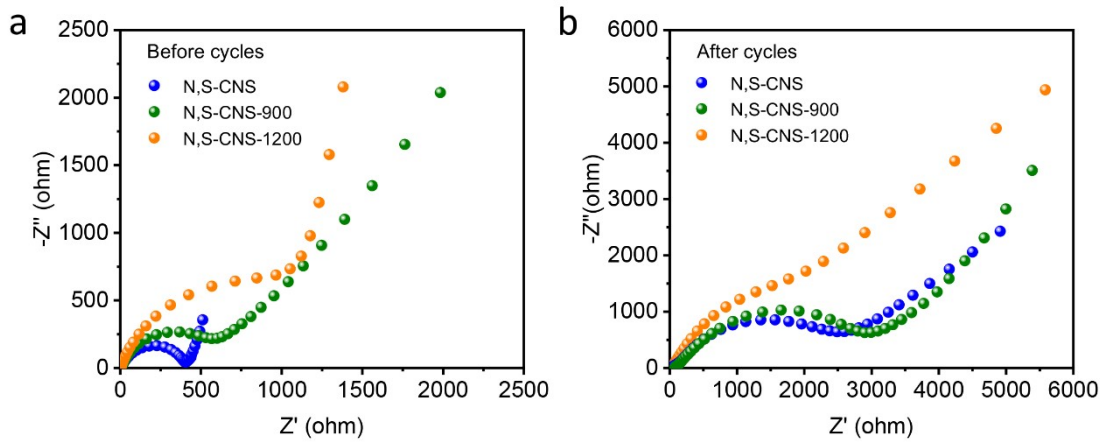

**Fig. S11** Nyquist plots of N,S-CNS samples recorded at (a) before cycles and (b) after cycles.

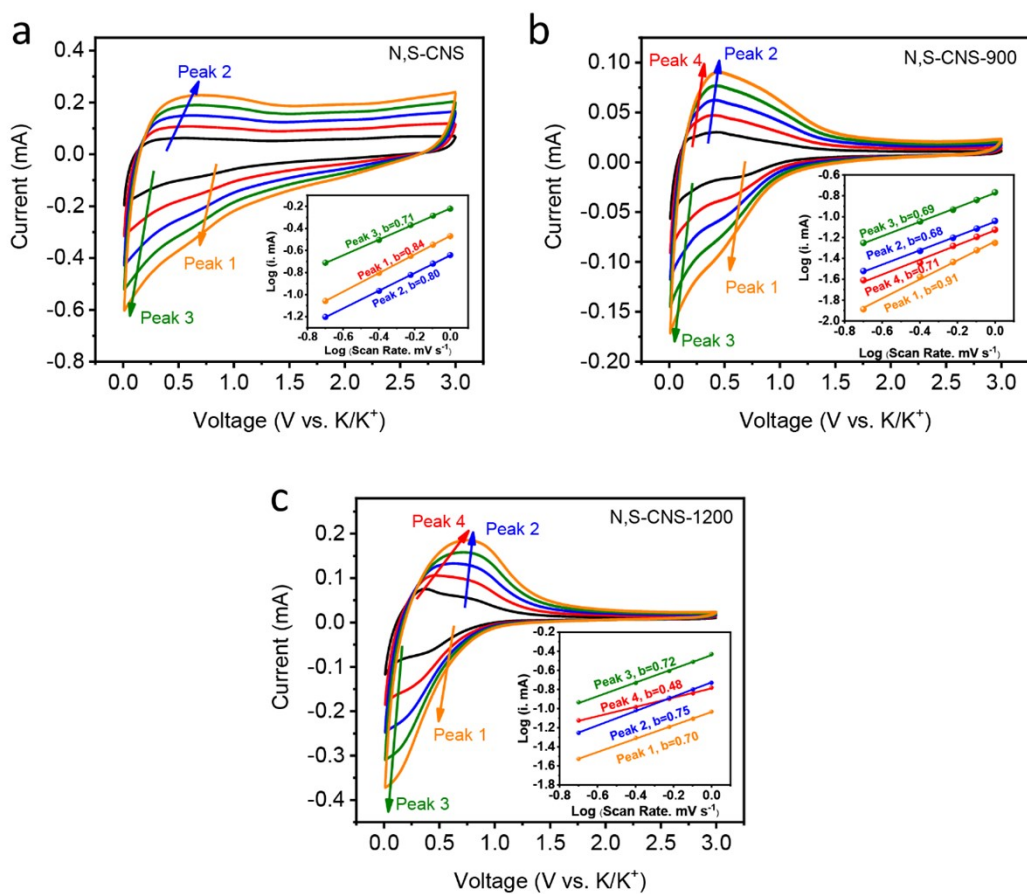

**Fig. S12** CV profiles of (a) N,S-CNS, (b) N,S-CNS-900 and (c) N,S-CNS-1200 at different scan rates between 0.2 and 1.0 mV s<sup>-1</sup> ( Inset is b-value analysis using the relationship between peak current and scan rate).

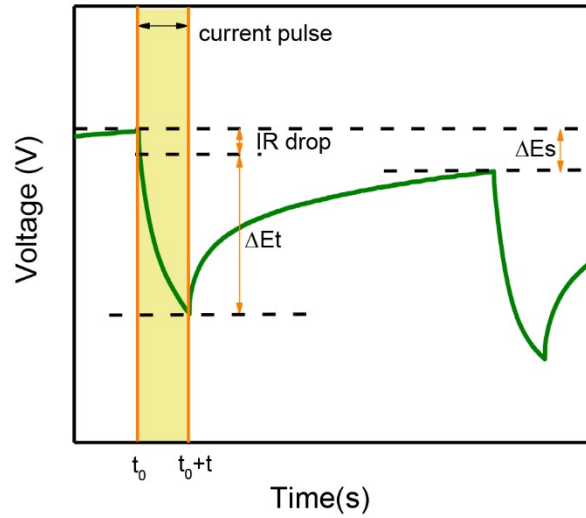

**Fig. S13** The schematic illustration for the GITT calculation method.

The first cycle is tested by galvanostatic charge-discharge curves with a current density of  $0.05 \text{ A g}^{-1}$ , and the second cycle is examined by GITT. The test procedure involves the application of a galvanostatic pulse of  $30 \text{ mA g}^{-1}$  for 30 min, followed by a 3 h relaxation process. The ion diffusion ( $D_k$ ) can be quantified as follow:<sup>19, 20</sup>

$$D_k = \frac{4}{\pi\tau} \left( \frac{m_B V_M}{M_B S} \right)^2 \left( \frac{\Delta E_S}{\Delta E_\tau} \right)^2 \quad (4)$$

where the current pulse time is expressed as  $\tau$ ,  $V_M$  and  $m_B$  are the molar volume and the mass of the active material; the molar mass of carbon is  $M_B$ ,  $S$  is the geometric contact area of the electrode; and  $\Delta E_S$  and  $\Delta E_\tau$  are the potential changes during the integrated pulse-relaxation process.

## Notes and references

- 1 L. Liu, Y. Chen, Y. Xie, P. Tao, Q. Li and C. Yan, *Adv. Funct. Mater.*, 2018, **28**, 1801989.
- 2 L. Liu, Z. Lin, J.-Y. Chane-Ching, H. Shao, P.-L. Taberna and P. Simon, *Energy Storage Mater.*, 2019, **19**, 306-313.
- 3 J. Yang, Z. Ju, Y. Jiang, Z. Xing, B. Xi, J. Feng and S. Xiong, *Adv. Mater.*, 2018, **30**, 1700104.
- 4 Y. Xu, C. Zhang, M. Zhou, Q. Fu, C. Zhao, M. Wu and Y. Lei, *Nat. Commun.*, 2018, **9**, 1720.
- 5 Y. Liu, H. Dai, L. Wu, W. Zhou, L. He, W. Wang, W. Yan, Q. Huang, L. Fu and Y. Wu, *Adv. Energy Mater.*, 2019, **9**, 1901379.
- 6 J. Lu, C. Wang, H. Yu, S. Gong, G. Xia, P. Jiang, P. Xu, K. Yang and Q. Chen, *Adv. Funct. Mater.*, 2019, **29**, 1906126.
- 7 D. Li, Q. Sun, Y. Zhang, X. Dai, F. Ji, K. Li, Q. Yuan, X. Liu and L. Ci, *Nano Res*, 2021, 2021, **21**, 3324.
- 8 D. Li, X. Ren, Q. Ai, Q. Sun, L. Zhu, Y. Liu, Z. Liang, R. Peng, P. Si, J. Lou, J. Feng and L. Ci, *Adv. Energy Mater.*, 2018, **8**, 1802386.
- 9 F. Xu, Y. Zhai, E. Zhang, Q. Liu, G. Jiang, X. Xu, Y. Qiu, X. Liu, H. Wang and S. Kaskel, *Angew. Chem. Int. Edit.*, 2020, **59**, 19460-19467.
- 10 Z. Ju, S. Zhang, Z. Xing, Q. Zhuang, Y. Qiang and Y. Qian, *ACS Appl. Mater. Interfaces*, 2016, **8**, 20682-20690.
- 11 X. Qi, K. Huang, X. Wu, W. Zhao, H. Wang, Q. Zhuang and Z. Ju, *Carbon*, 2018, **131**, 79-85.
- 12 C. Lv, W. Xu, H. Liu, L. Zhang, S. Chen, X. Yang, X. Xu and D. Yang, *Small*, 2019, **15**, 1900816.
- 13 Y. Liu, C. Yang, Q. Pan, Y. Li, G. Wang, X. Ou, F. Zheng, X. Xiong, M. Liu and Q. Zhang, *J. Mater. Chem. A*, 2018, **6**, 15162-15169.
- 14 Y. Zhao, Z. Sun, Y. Yi, C. Lu, M. Wang, Z. Xia, X. Lian, Z. Liu and J. Sun, *Nano Res*, 2021, **14**, 1413-1420.
- 15 Y. Zuo, P. Li, R. Zang, S. Wang, Z. Man, P. Li, S. Wang and W. Zhou, *ACS Appl. Energy Mater.*, 2021, **4**, 2282-2291.
- 16 Q. Liu, F. Han, J. Zhou, Y. Li, L. Chen, F. Zhang, D. Zhou, C. Ye, J. Yang, X. Wu and J. Liu, *ACS Appl. Mater. Interfaces*, 2020, **12**, 20838-20848.
- 17 W. Feng, N. Feng, W. Liu, Y. Cui, C. Chen, T. Dong, S. Liu, W. Deng, H. Wang and Y. Jin, *Adv. Energy Mater.*, 2021, **11**, 2003215.
- 18 S. Xu, L. Cai, P. Niu, Z. Li, L. Wei, G. Yao, C. Wang, F. Zheng and Q. Chen, *Carbon*, 2021, **178**, 256-264.
- 19 K. Tang, X. Yu, J. Sun, H. Li and X. Huang, *Electrochim. Acta*, 2011, **56**, 4869-4875.
- 20 D. Qiu, J. Guan, M. Li, C. Kang, J. Wei, Y. Li, Z. Xie, F. Wang and R. Yang, *Adv. Funct. Mater.*, 2019, **29**, 1903496.
